# Supplementary material for: Evaluating the reach, effectiveness, and maintenance of an online spinal cord injury research advocacy course to train research partners
Source: Research Square preprint supplement (doi:10.21203/rs.3.rs-6916049/v1), 2025-07-02
Supplement: Supplementary file 1 [file 3c39e95a28482624a05a0c0d.docx]

**Supplementary File 1. Description of Partnership, Partnership Activities, and SCI-RAC Modules**

**The Integrated Knowledge Translation Guiding Principles**

| **Principle** | **Strategy** |
| --- | --- |
| Partners develop and maintain relationships based on trust, respect, dignity, and transparency. | NASCIC has been a partner with HG since its inception, and NASCIC is a partner of the IKT Guiding Principles Partnership. Over the time they have worked together, NASCIC and HG have developed trust through transparent and respectful communication. As a trainee of HG, EG has begun developing her own partnership with NASCIC, following similar actions of transparent and respectful communication. |
| Partners share in decision-making. | No single member of the partnership made any decisions regarding the project without confirmation or a check-in with all other partnership members. |
| Partners foster open, honest, and responsive communication. | All partners were aware of preferred communication methods, and external deadlines, and were mindful of these |
| Partners recognize, value, and share their diverse expertise and knowledge. | BM, GO, and the NASCIC Community Engagement Working Group (CEWG)’s unique knowledge was incorporated throughout the project (e.g., modifying wording to align more with an American context, aligning partnership behaviours with NASCIC’s preferred goals of their membership and SCI research more broadly). |
| Partners are flexible and receptive in tailoring the research approach to match the aims and context of the project. | NASCIC came to HG and EG asking for them to evaluate the course. All decisions regarding the research approach have been in consideration of the projects aims. For example, NASCIC wanted to know if “SCI-RAC works,” so we worked with NASCIC to further define what was meant by “works.” |
| Partners can meaningfully benefit by participating in the partnership. | The production of a manuscript of this work is supportive in both EG and HG’s careers.  NASCIC has been able to use the findings to inform future iterations of the course (e.g., the creation of SCI-RAC) and plans to use the findings to disseminate the course to more audiences. |
| Partners address ethical considerations. | Intentional decisions were made to protect the anonymity of participants by choosing to not disaggregate participants’ multiple roles or analyze data from an intersectional lens. |
| Partners respect the practical considerations and financial constraints of all partners. | Given the partnership’s financial constraints, a mutual decision was made to not examine the adoption, implementation (and associated maintenance) domains. |

**Philosophical Assumptions and Partnership Approach**

This study was guided by critical realism (1,2). Aligning with ontological realism, we sought objective truths. While seeking these objective truths, we were conscious that the answers to these truths were shaped by unobservable and context-dependent influences (1,3). For example, while answering *who* participated in the course, we also wanted to highlight who was *not* accessing or benefitting from the course and within our means, sought to understand why that may be. Methodologically, we used quantitative surveys to seek objective truths about SCI-RAC, however, intentional decisions throughout the study were made to try and understand these truths (e.g., presentation of disaggregated demographic and injury data, the use of open-ended questions throughout the survey).

Moreover, this study was conducted in partnership using an integrated knowledge translation (IKT) approach, meaning NASCIC representatives was engaged at the “right” times throughout the research process (4). Our partnership mutually decided on the right times for NASCIC to be engaged (e.g., selecting appropriate outcome measures), and strived to follow the Integrated Knowledge Translation Guiding Principles for Conducting and Disseminating SCI Research in Partnership (IKT Guiding Principles)(4). Supplementary File 1 outlines how NASCIC was engaged throughout the evaluation and strategies that were adopted to try and follow the IKT Guiding Principles.

**References**

1. McEvoy P, Richards D. Critical realism: a way forward for evaluation research in nursing? J Adv Nurs. 2003 Aug;43(4):411–20.

2. Bhaskar R. Scientific Realism & Human Emancipation. London: Routledge; 2009. 360 p.

3. Quraishi M, Irfan L, Schneuwly Purdie M, Wilkinson MLN. Doing ‘judgemental rationality’ in empirical research: the importance of depth-reflexivity when researching in prison. J Crit Realism. 2022 Jan 1;21(1):25–45.

4. Gainforth HL, Hoekstra F, McKay R, McBride CB, Sweet SN, Martin Ginis KA, et al. Integrated Knowledge Translation Guiding Principles for Conducting and Disseminating Spinal Cord Injury Research in Partnership. Arch Phys Med Rehabil. 2021 Apr 1;102(4):656–63.

**Table S1. Partnership Activity Log**

| **Research Stage** | **Activity/Strategy** | **Description** |
| --- | --- | --- |
| Planning (Study Design) | Attendance at NASCIC Community Engagement Working Group (CEWG) Course Development Meetings | EG listened in on NASCIC CEWG Meetings to further learn about the context of the project. Additionally, as aspects of the evaluation were being designed, EG and HG regularly checked in with the CEWG to ensure that all surveys and measures aligned with the course’s learning objectives and users. Some examples of how these meetings helped to inform study design are included here:   - The initial demographic questions developed, informed by Hughes et al. and the Canadian Institute for Health Information were presented to the CEWG. Suggestions were made to specific constructs to ensure the questions would accommodate both Canadian and American contexts. - EG prepared and presented a protocol for using COM-B as the guiding theoretical framework in the evaluation. The NASCIC CEWG confirmed that the theory aligned with the course’s learning objectives. - Specific behaviours (i.e., observable actions) that constituted “building capacity” for research partnerships were brainstormed with the CEWG and added to the surveys. |
| Conduct (Data Collection) | NASCIC led all recruitment efforts | Given the independent nature of the evaluation, UBC (EG, HG) was not responsible for any study aspects related to recruitment. |
| Conduct (Data Analysis) | Periodic presentation of findings | Given the independent nature of the evaluation, BM and GO did not analyze any data.  Throughout analysis, results from the evaluation were presented to BM and GO. BM and GO used these findings to inform the ongoing development of SCI-RAC Lite.  EG, KN, and HG checked-in with BM and GO (who followed up with the NASCIC Project Executive Committee and CEWG to see if any additional ways to analyze data would be helpful to NASCIC. This is where the decision came to disaggregate analyses by presence vs. absence of a SCI. |
| Conduct (Manuscript Writing) | E-mails were sent back and forth between co-authors to facilitate the writing and finalization of a manuscript to be submitted for publication. | EG drafted an initial version of the manuscript for all co-authors to review and approve. Once approved, EG submitted the manuscript for publication. |
| Conduct (Dissemination) |  | EG and GO co-wrote abstracts for three conferences related to this work. All abstracts were reviewed and approved by all co-authors.  List of Conferences:   - EG presented a poster the proposed methods for the evaluation at the European Implementation Event (June 2023; Basel, Switzerland). - EG and BM co-presented initial findings from the evaluation in-person at the Paralyzed Veterans of America Summit (August 2024; Anaheim, USA) and virtually for the Academy of Spinal Cord Injury Professionals Annual Meeting and Expo (September 2024; Chicago, USA) |

**List of SCI-RAC Modules**

| **Module #** | **Title** |
| --- | --- |
| 1 | Introduction to Research Advocacy |
| 2 | Understanding the Research Process and Research and Development Decision-Makers |
| 3 | Addressing Historical Challenges for SCI Studies |
| 4 | SCI Biology Part 1: How an SCI causes loss of function |
| 5 | SCI Biology Part 2: Aging with a spinal cord injury |
| 6 | Neuroprotection |
| 7 | Cell Replacement |
| 8 | Regeneration (Neurorepair) |
| 9 | Retraining (Neuroplasticity) |
| 10 | Quality of Life Research |
| 11 | SCI 101 for Researchers |
| 12 | Getting Started |
