# Supplementary material for: Evaluating the reach, effectiveness, and maintenance of an online spinal cord injury research advocacy course to train research partners
Source: Research Square preprint supplement (doi:10.21203/rs.3.rs-6916049/v1), 2025-07-02
Supplement: Supplementary file 2 [file 4b39e53bcedef890a6841964.docx]

**Supplementary File 2. Survey Questions**

**Introduction Questions (All Participants)**

1. **Role in SCI: Which role(s) best describe you?**
   - Person living with a spinal cord injury
   - Family member, friend, or formal caregiver of a person with a SCI
   - Researcher
   - Clinician
   - Knowledge Broker/Engagement Specialist
   - SCI organization staff member/volunteer
   - SCI policy maker
   - Funder of SCI research
   - Biotech/industry staff
   - Not listed (please specify): _______________
2. **Research Area: Please select which discipline(s) of SCI research you currently work within, or have you interested in becoming a research advocate or partner. Select all that apply:**
   - Injury prevention (e.g., helmet performance)
   - Preclinical research (e.g., neuroprotection, cell transplantation, neuroregeneration)
   - Clinical intervention after SCI (e.g., nerve transfer, electrical stimulation, secondary complications after SCI)
   - Rehabilitation research (research topics for inpatient rehabilitation – e.g., mobility, coping, short-term psychosocial outcomes)
   - Community research (research topics for long-term outcomes – e.g., employment, aging, long-term psychosocial outcomes)
   - Not listed (please specify): _______________

**Primary Effectiveness Outcome Questions**

- **If the participant selected their role as one of the following “person living with SCI,” “family member, friend, or formal caregiver of a person with SCI,” “SCI community staff member/volunteer,” they were asked to answer the following questions.**

***Behaviour #1: Participating on a consumer advisory board***

***“I know how to participate on a consumer advisory board.”***

| **Unsure How to Answer** | **Strongly Disagree**  **1** | **Disagree**  **2** | **Somewhat Disagree**  **3** | **Neutral**  **4** | **Somewhat Agree**  **5** | **Agree**  **6** | **Strongly Agree**  **7** |
| --- | --- | --- | --- | --- | --- | --- | --- |
|  |  |  |  |  |  |  |  |

***“My physical environment (e.g., time, technology, accessible meeting space) provides me with the opportunity to participate on a consumer advisory board.”***

| **Unsure How to Answer** | **Strongly Disagree**  **1** | **Disagree**  **2** | **Somewhat Disagree**  **3** | **Neutral**  **4** | **Somewhat Agree**  **5** | **Agree**  **6** | **Strongly Agree**  **7** |
| --- | --- | --- | --- | --- | --- | --- | --- |
|  |  |  |  |  |  |  |  |

***“My social and/or professional network provides me with the opportunity to participate on a consumer advisory board.”***

| **Unsure How to Answer** | **Strongly Disagree**  **1** | **Disagree**  **2** | **Somewhat Disagree**  **3** | **Neutral**  **4** | **Somewhat Agree**  **5** | **Agree**  **6** | **Strongly Agree**  **7** |
| --- | --- | --- | --- | --- | --- | --- | --- |
|  |  |  |  |  |  |  |  |

***“I want to participate on a consumer advisory board”***

| **Unsure How to Answer** | **Strongly Disagree**  **1** | **Disagree**  **2** | **Somewhat Disagree**  **3** | **Neutral**  **4** | **Somewhat Agree**  **5** | **Agree**  **6** | **Strongly Agree**  **7** |
| --- | --- | --- | --- | --- | --- | --- | --- |
|  |  |  |  |  |  |  |  |

***“I am confident in my ability to participate on a consumer advisory board.”***

| **Unsure How to Answer** | **Strongly Disagree**  **1** | **Disagree**  **2** | **Somewhat Disagree**  **3** | **Neutral**  **4** | **Somewhat Agree**  **5** | **Agree**  **6** | **Strongly Agree**  **7** |
| --- | --- | --- | --- | --- | --- | --- | --- |
|  |  |  |  |  |  |  |  |

***“I see the value in and benefits of participating on a consumer advisory board.”***

| **Unsure How to Answer** | **Strongly Disagree**  **1** | **Disagree**  **2** | **Somewhat Disagree**  **3** | **Neutral**  **4** | **Somewhat Agree**  **5** | **Agree**  **6** | **Strongly Agree**  **7** |
| --- | --- | --- | --- | --- | --- | --- | --- |
|  |  |  |  |  |  |  |  |

***Behaviour #2: Engage in meaningful discussions about research during focus groups, interviews, and/or roundtable discussions***

***“I know how to engage in meaningful discussions about research during focus groups, interviews, and/or roundtable discussions.”***

| **Unsure How to Answer** | **Strongly Disagree**  **1** | **Disagree**  **2** | **Somewhat Disagree**  **3** | **Neutral**  **4** | **Somewhat Agree**  **5** | **Agree**  **6** | **Strongly Agree**  **7** |
| --- | --- | --- | --- | --- | --- | --- | --- |
|  |  |  |  |  |  |  |  |

***“My physical environment (e.g., time, technology, accessible meeting space) provides me with the opportunity to engage in meaningful discussions about research during focus groups, interviews, and/or roundtable discussions.”***

| **Unsure How to Answer** | **Strongly Disagree**  **1** | **Disagree**  **2** | **Somewhat Disagree**  **3** | **Neutral**  **4** | **Somewhat Agree**  **5** | **Agree**  **6** | **Strongly Agree**  **7** |
| --- | --- | --- | --- | --- | --- | --- | --- |
|  |  |  |  |  |  |  |  |

***“My social and/or professional network provides me with the opportunity to engage* *in meaningful discussions about research during focus groups, interviews, and/or roundtable discussions.”***

| **Unsure How to Answer** | **Strongly Disagree**  **1** | **Disagree**  **2** | **Somewhat Disagree**  **3** | **Neutral**  **4** | **Somewhat Agree**  **5** | **Agree**  **6** | **Strongly Agree**  **7** |
| --- | --- | --- | --- | --- | --- | --- | --- |
|  |  |  |  |  |  |  |  |

***“I want to engage in meaningful discussions about research during focus groups, interviews, and/or roundtable discussions.”***

| **Unsure How to Answer** | **Strongly Disagree**  **1** | **Disagree**  **2** | **Somewhat Disagree**  **3** | **Neutral**  **4** | **Somewhat Agree**  **5** | **Agree**  **6** | **Strongly Agree**  **7** |
| --- | --- | --- | --- | --- | --- | --- | --- |
|  |  |  |  |  |  |  |  |

***“I am confident in my ability to engage in meaningful discussions about research during focus groups, interviews, and/or roundtable discussions.”***

| **Unsure How to Answer** | **Strongly Disagree**  **1** | **Disagree**  **2** | **Somewhat Disagree**  **3** | **Neutral**  **4** | **Somewhat Agree**  **5** | **Agree**  **6** | **Strongly Agree**  **7** |
| --- | --- | --- | --- | --- | --- | --- | --- |
|  |  |  |  |  |  |  |  |

***“I see the value in and benefits of engaging in meaningful* *discussions about research during focus groups, interviews, and/or roundtable discussions.”***

| **Unsure How to Answer** | **Strongly Disagree**  **1** | **Disagree**  **2** | **Somewhat Disagree**  **3** | **Neutral**  **4** | **Somewhat Agree**  **5** | **Agree**  **6** | **Strongly Agree**  **7** |
| --- | --- | --- | --- | --- | --- | --- | --- |
|  |  |  |  |  |  |  |  |

***Behaviour #3: Advocate for people with SCI on public forums (e.g., podium, speaking positions, panel discussions, webinar/podcasts, etc.)***

***“I know how to advocate for people with SCI on public forums (e.g., podium speaking positions, panel discussions, webinar/podcasts, etc).”***

| **Unsure How to Answer** | **Strongly Disagree**  **1** | **Disagree**  **2** | **Somewhat Disagree**  **3** | **Neutral**  **4** | **Somewhat Agree**  **5** | **Agree**  **6** | **Strongly Agree**  **7** |
| --- | --- | --- | --- | --- | --- | --- | --- |
|  |  |  |  |  |  |  |  |

***“My physical environment (e.g., time, technology, accessible meeting space) provides me with the opportunity to advocate for people with SCI on public forums (e.g., podium speaking positions, panel discussions, webinar/podcasts, etc.).”***

| **Unsure How to Answer** | **Strongly Disagree**  **1** | **Disagree**  **2** | **Somewhat Disagree**  **3** | **Neutral**  **4** | **Somewhat Agree**  **5** | **Agree**  **6** | **Strongly Agree**  **7** |
| --- | --- | --- | --- | --- | --- | --- | --- |
|  |  |  |  |  |  |  |  |

***“My social and/or professional network provides me with the opportunity to advocate for people with SCI on public forums (e.g., podium speaking positions, panel discussions, webinar/podcasts, etc.).”***

| **Unsure How to Answer** | **Strongly Disagree**  **1** | **Disagree**  **2** | **Somewhat Disagree**  **3** | **Neutral**  **4** | **Somewhat Agree**  **5** | **Agree**  **6** | **Strongly Agree**  **7** |
| --- | --- | --- | --- | --- | --- | --- | --- |
|  |  |  |  |  |  |  |  |

***“I want to advocate for people with SCI on public forums (e.g., podium speaking positions, panel discussions, webinar/podcasts, etc.).”***

| **Unsure How to Answer** | **Strongly Disagree**  **1** | **Disagree**  **2** | **Somewhat Disagree**  **3** | **Neutral**  **4** | **Somewhat Agree**  **5** | **Agree**  **6** | **Strongly Agree**  **7** |
| --- | --- | --- | --- | --- | --- | --- | --- |
|  |  |  |  |  |  |  |  |

***“I am confident in my ability to advocate for people with SCI on public forums (e.g., podium speaking positions, panel discussions, webinar/podcasts, etc.).”***

| **Unsure How to Answer** | **Strongly Disagree**  **1** | **Disagree**  **2** | **Somewhat Disagree**  **3** | **Neutral**  **4** | **Somewhat Agree**  **5** | **Agree**  **6** | **Strongly Agree**  **7** |
| --- | --- | --- | --- | --- | --- | --- | --- |
|  |  |  |  |  |  |  |  |

***“I see the value in and benefits of advocating for people with SCI on public forums (e.g., podium speaking positions, panel discussion, webinar/podcasts, etc.).”***

| **Unsure How to Answer** | **Strongly Disagree**  **1** | **Disagree**  **2** | **Somewhat Disagree**  **3** | **Neutral**  **4** | **Somewhat Agree**  **5** | **Agree**  **6** | **Strongly Agree**  **7** |
| --- | --- | --- | --- | --- | --- | --- | --- |
|  |  |  |  |  |  |  |  |

***Behaviour #3: Review a grant application for SCI research***

***“I know how to review grant application for SCI research”***

| **Unsure How to Answer** | **Strongly Disagree**  **1** | **Disagree**  **2** | **Somewhat Disagree**  **3** | **Neutral**  **4** | **Somewhat Agree**  **5** | **Agree**  **6** | **Strongly Agree**  **7** |
| --- | --- | --- | --- | --- | --- | --- | --- |
|  |  |  |  |  |  |  |  |

***“My physical environment (e.g., time, technology, accessible meeting space) provides me with the opportunity to review grant applications for SCI research.”***

| **Unsure How to Answer** | **Strongly Disagree**  **1** | **Disagree**  **2** | **Somewhat Disagree**  **3** | **Neutral**  **4** | **Somewhat Agree**  **5** | **Agree**  **6** | **Strongly Agree**  **7** |
| --- | --- | --- | --- | --- | --- | --- | --- |
|  |  |  |  |  |  |  |  |

***“My social and/or professional network provides me with the opportunity to review grant applications for SCI research.”***

| **Unsure How to Answer** | **Strongly Disagree**  **1** | **Disagree**  **2** | **Somewhat Disagree**  **3** | **Neutral**  **4** | **Somewhat Agree**  **5** | **Agree**  **6** | **Strongly Agree**  **7** |
| --- | --- | --- | --- | --- | --- | --- | --- |
|  |  |  |  |  |  |  |  |

***“I want to review grant applications for SCI research.”***

| **Unsure How to Answer** | **Strongly Disagree**  **1** | **Disagree**  **2** | **Somewhat Disagree**  **3** | **Neutral**  **4** | **Somewhat Agree**  **5** | **Agree**  **6** | **Strongly Agree**  **7** |
| --- | --- | --- | --- | --- | --- | --- | --- |
|  |  |  |  |  |  |  |  |

***“I am confident in my ability to review grant applications for SCI research.”***

| **Unsure How to Answer** | **Strongly Disagree**  **1** | **Disagree**  **2** | **Somewhat Disagree**  **3** | **Neutral**  **4** | **Somewhat Agree**  **5** | **Agree**  **6** | **Strongly Agree**  **7** |
| --- | --- | --- | --- | --- | --- | --- | --- |
|  |  |  |  |  |  |  |  |

***“I see the value in and benefits of reviewing grant applications for SCI research.”***

| **Unsure How to Answer** | **Strongly Disagree**  **1** | **Disagree**  **2** | **Somewhat Disagree**  **3** | **Neutral**  **4** | **Somewhat Agree**  **5** | **Agree**  **6** | **Strongly Agree**  **7** |
| --- | --- | --- | --- | --- | --- | --- | --- |
|  |  |  |  |  |  |  |  |

***Behaviour #4: Partner with a researcher throughout the research process***

**“*I know how to partner with a researcher throughout the research process.”***

| **Unsure How to Answer** | **Strongly Disagree**  **1** | **Disagree**  **2** | **Somewhat Disagree**  **3** | **Neutral**  **4** | **Somewhat Agree**  **5** | **Agree**  **6** | **Strongly Agree**  **7** |
| --- | --- | --- | --- | --- | --- | --- | --- |
|  |  |  |  |  |  |  |  |

***“My physical environment (e.g., time, technology, accessible meeting space) provides me with the opportunity to partner with a researcher throughout the research process.”***

| **Unsure How to Answer** | **Strongly Disagree**  **1** | **Disagree**  **2** | **Somewhat Disagree**  **3** | **Neutral**  **4** | **Somewhat Agree**  **5** | **Agree**  **6** | **Strongly Agree**  **7** |
| --- | --- | --- | --- | --- | --- | --- | --- |
|  |  |  |  |  |  |  |  |

***“My social and/or professional network provides me with the opportunity to partner with a researcher throughout the research process.”***

| **Unsure How to Answer** | **Strongly Disagree**  **1** | **Disagree**  **2** | **Somewhat Disagree**  **3** | **Neutral**  **4** | **Somewhat Agree**  **5** | **Agree**  **6** | **Strongly Agree**  **7** |
| --- | --- | --- | --- | --- | --- | --- | --- |
|  |  |  |  |  |  |  |  |

***“I want to partner with a researcher throughout the research process.”***

| **Unsure How to Answer** | **Strongly Disagree**  **1** | **Disagree**  **2** | **Somewhat Disagree**  **3** | **Neutral**  **4** | **Somewhat Agree**  **5** | **Agree**  **6** | **Strongly Agree**  **7** |
| --- | --- | --- | --- | --- | --- | --- | --- |
|  |  |  |  |  |  |  |  |

***“I am confident in my ability to partner with a researcher throughout the research process.”***

| **Unsure How to Answer** | **Strongly Disagree**  **1** | **Disagree**  **2** | **Somewhat Disagree**  **3** | **Neutral**  **4** | **Somewhat Agree**  **5** | **Agree**  **6** | **Strongly Agree**  **7** |
| --- | --- | --- | --- | --- | --- | --- | --- |
|  |  |  |  |  |  |  |  |

***“I see the value in and benefits of partnering with a researcher throughout the research process.”***

| **Unsure How to Answer** | **Strongly Disagree**  **1** | **Disagree**  **2** | **Somewhat Disagree**  **3** | **Neutral**  **4** | **Somewhat Agree**  **5** | **Agree**  **6** | **Strongly Agree**  **7** |
| --- | --- | --- | --- | --- | --- | --- | --- |
|  |  |  |  |  |  |  |  |

- **If the participant selected their role as one of the following “researcher,” “clinician,” “policy maker," "funder of SCI research,” “knowledge broker/engagement specialist” they were asked to answer the following questions.**

***Behaviour #1: Meaningfully engage with a consumer advisory board***

***“I know how to meaningfully engage with a consumer advisory board.”***

| **Unsure How to Answer** | **Strongly Disagree**  **1** | **Disagree**  **2** | **Somewhat Disagree**  **3** | **Neutral**  **4** | **Somewhat Agree**  **5** | **Agree**  **6** | **Strongly Agree**  **7** |
| --- | --- | --- | --- | --- | --- | --- | --- |
|  |  |  |  |  |  |  |  |

***“My physical environment (e.g., time, technology, accessible meeting space) provides me with the opportunity to meaningfully engage with a consumer advisory board.”***

| **Unsure How to Answer** | **Strongly Disagree**  **1** | **Disagree**  **2** | **Somewhat Disagree**  **3** | **Neutral**  **4** | **Somewhat Agree**  **5** | **Agree**  **6** | **Strongly Agree**  **7** |
| --- | --- | --- | --- | --- | --- | --- | --- |
|  |  |  |  |  |  |  |  |

***“My social and/or professional network provides me with the opportunity to meaningfully engage with a consumer advisory board.”***

| **Unsure How to Answer** | **Strongly Disagree**  **1** | **Disagree**  **2** | **Somewhat Disagree**  **3** | **Neutral**  **4** | **Somewhat Agree**  **5** | **Agree**  **6** | **Strongly Agree**  **7** |
| --- | --- | --- | --- | --- | --- | --- | --- |
|  |  |  |  |  |  |  |  |

***“I want to meaningfully engage with a consumer advisory board”***

| **Unsure How to Answer** | **Strongly Disagree**  **1** | **Disagree**  **2** | **Somewhat Disagree**  **3** | **Neutral**  **4** | **Somewhat Agree**  **5** | **Agree**  **6** | **Strongly Agree**  **7** |
| --- | --- | --- | --- | --- | --- | --- | --- |
|  |  |  |  |  |  |  |  |

***“I am confident in my ability to meaningfully engage with a consumer advisory board.”***

| **Unsure How to Answer** | **Strongly Disagree**  **1** | **Disagree**  **2** | **Somewhat Disagree**  **3** | **Neutral**  **4** | **Somewhat Agree**  **5** | **Agree**  **6** | **Strongly Agree**  **7** |
| --- | --- | --- | --- | --- | --- | --- | --- |
|  |  |  |  |  |  |  |  |

***“I see the value in and benefits of meaningfully engaging with a consumer advisory board.”***

| **Unsure How to Answer** | **Strongly Disagree**  **1** | **Disagree**  **2** | **Somewhat Disagree**  **3** | **Neutral**  **4** | **Somewhat Agree**  **5** | **Agree**  **6** | **Strongly Agree**  **7** |
| --- | --- | --- | --- | --- | --- | --- | --- |
|  |  |  |  |  |  |  |  |

***Behaviour #2: Review grant applications for SCI research projects that include meaningful engagement of people living with SCI.***

***“I know how to review grant applications for SCI research that include meaningful engagement of people living with SCI.”***

| **Unsure How to Answer** | **Strongly Disagree**  **1** | **Disagree**  **2** | **Somewhat Disagree**  **3** | **Neutral**  **4** | **Somewhat Agree**  **5** | **Agree**  **6** | **Strongly Agree**  **7** |
| --- | --- | --- | --- | --- | --- | --- | --- |
|  |  |  |  |  |  |  |  |

***“My physical environment (e.g., time, technology, accessible meeting space) provides me with the opportunity to review grant applications for SCI research that include meaningful engagement of people living with SCI.”***

| **Unsure How to Answer** | **Strongly Disagree**  **1** | **Disagree**  **2** | **Somewhat Disagree**  **3** | **Neutral**  **4** | **Somewhat Agree**  **5** | **Agree**  **6** | **Strongly Agree**  **7** |
| --- | --- | --- | --- | --- | --- | --- | --- |
|  |  |  |  |  |  |  |  |

***“My social and/or professional network provides me with the opportunity to review grant applications for SCI research that include meaningful engagement of people living with SCI.”***

| **Unsure How to Answer** | **Strongly Disagree**  **1** | **Disagree**  **2** | **Somewhat Disagree**  **3** | **Neutral**  **4** | **Somewhat Agree**  **5** | **Agree**  **6** | **Strongly Agree**  **7** |
| --- | --- | --- | --- | --- | --- | --- | --- |
|  |  |  |  |  |  |  |  |

***“I want to review grant applications for SCI research that include meaningful engagement of people living with SCI.”***

| **Unsure How to Answer** | **Strongly Disagree**  **1** | **Disagree**  **2** | **Somewhat Disagree**  **3** | **Neutral**  **4** | **Somewhat Agree**  **5** | **Agree**  **6** | **Strongly Agree**  **7** |
| --- | --- | --- | --- | --- | --- | --- | --- |
|  |  |  |  |  |  |  |  |

***“I am confident in my ability to review grant applications for SCI research that include meaningful engagement of people living with SCI.”***

| **Unsure How to Answer** | **Strongly Disagree**  **1** | **Disagree**  **2** | **Somewhat Disagree**  **3** | **Neutral**  **4** | **Somewhat Agree**  **5** | **Agree**  **6** | **Strongly Agree**  **7** |
| --- | --- | --- | --- | --- | --- | --- | --- |
|  |  |  |  |  |  |  |  |

***“I see the value in and benefits of reviewing grant applications for SCI research that include meaningful engagement of people living with SCI.”***

| **Unsure How to Answer** | **Strongly Disagree**  **1** | **Disagree**  **2** | **Somewhat Disagree**  **3** | **Neutral**  **4** | **Somewhat Agree**  **5** | **Agree**  **6** | **Strongly Agree**  **7** |
| --- | --- | --- | --- | --- | --- | --- | --- |
|  |  |  |  |  |  |  |  |

***Behaviour #3: Partnering with research users***

***“I know how to partner with research users in my role.”***

| **Unsure How to Answer** | **Strongly Disagree**  **1** | **Disagree**  **2** | **Somewhat Disagree**  **3** | **Neutral**  **4** | **Somewhat Agree**  **5** | **Agree**  **6** | **Strongly Agree**  **7** |
| --- | --- | --- | --- | --- | --- | --- | --- |
|  |  |  |  |  |  |  |  |

***“My physical environment (e.g., time, technology, accessible meeting space) provides me with the opportunity to partner with research users in my role.”***

| **Unsure How to Answer** | **Strongly Disagree**  **1** | **Disagree**  **2** | **Somewhat Disagree**  **3** | **Neutral**  **4** | **Somewhat Agree**  **5** | **Agree**  **6** | **Strongly Agree**  **7** |
| --- | --- | --- | --- | --- | --- | --- | --- |
|  |  |  |  |  |  |  |  |

***“My social and/or professional network provides me with the opportunity to partner with research users in my role.”***

| **Unsure How to Answer** | **Strongly Disagree**  **1** | **Disagree**  **2** | **Somewhat Disagree**  **3** | **Neutral**  **4** | **Somewhat Agree**  **5** | **Agree**  **6** | **Strongly Agree**  **7** |
| --- | --- | --- | --- | --- | --- | --- | --- |
|  |  |  |  |  |  |  |  |

***“I want to partner with research users in my role.”***

| **Unsure How to Answer** | **Strongly Disagree**  **1** | **Disagree**  **2** | **Somewhat Disagree**  **3** | **Neutral**  **4** | **Somewhat Agree**  **5** | **Agree**  **6** | **Strongly Agree**  **7** |
| --- | --- | --- | --- | --- | --- | --- | --- |
|  |  |  |  |  |  |  |  |

***“I am confident in my ability to partner with research users in my role.”***

| **Unsure How to Answer** | **Strongly Disagree**  **1** | **Disagree**  **2** | **Somewhat Disagree**  **3** | **Neutral**  **4** | **Somewhat Agree**  **5** | **Agree**  **6** | **Strongly Agree**  **7** |
| --- | --- | --- | --- | --- | --- | --- | --- |
|  |  |  |  |  |  |  |  |

***“I see the value in and benefits of partnering with research users in my role.”***

| **Unsure How to Answer** | **Strongly Disagree**  **1** | **Disagree**  **2** | **Somewhat Disagree**  **3** | **Neutral**  **4** | **Somewhat Agree**  **5** | **Agree**  **6** | **Strongly Agree**  **7** |
| --- | --- | --- | --- | --- | --- | --- | --- |
|  |  |  |  |  |  |  |  |

**Secondary Effectiveness Measures**

|  | **True** | **False** | **I don't know** |
| --- | --- | --- | --- |
| **Basic SCI research aims to understand problems that are easy to solve for people with SCI.** |  |  |  |
| **All expenses are covered for people with SCI when they participate in research studies.** |  |  |  |
| **Research advocates can play a role in evaluating the validity and reliability of patient-related outcomes.** |  |  |  |
| **When research advocates are involved in designing study protocols, the overall feasibility of a study will likely increase.** |  |  |  |
| **When communicating study findings to the broader community, it’s important to make sure the messages are technical and overhyped, so that the research seems more credible and exciting.** |  |  |  |
| **Research advocates should understand details about the research project, duties, and time commitment before getting involved.** |  |  |  |
| **NASCIC has three programs to help facilitate engagement of people with lived experience.** |  |  |  |
| **NASCIC will help promote recruitment for any SCI research project.** |  |  |  |

**Demographic Questions**

**If you are a person with an SCI:**

1. **What was the year of your spinal cord injury?**
   1. (YYYY): _________
   2. I don’t know
   3. Prefer not to answer
2. **What is the level of your injury? Select all that apply:**
   - Cervical 1-4 (C1-C4); Upper Neck
   - Cervical 5-8 (C5-C8); Lower Neck
   - Thoracic 1-6 (T1-T6); Upper Back
   - Thoracic 7-12 (T7-T12; Mid Back
   - Lumbar 1-5 (L1-L5); Lower Back
   - Sacral 1-5 (S1-S5); Tailbone/Cauda Equina/Conus Medullaris
   - Not listed (please specify): ______________
   - I don’t know
   - Prefer not to answer
3. **Please identify if your injury is a complete or incomplete injury:
   a)** Complete: AIS-A Classification (There is no motor or sensory function below the level of injury)

**b)** Incomplete: AIS-B; AIS-C; AIS-D (Some nerve signals can communicate from below the level of injury; can be in the form of sensation, movement, or both)

**c)** I don’t know

**d)** Prefer not to answer

1. **A SCI can be caused by a traumatic (e.g., car accident, fall) or non-traumatic (e.g., tumor, infection), event. Based on these definitions, what was the cause of your SCI?**
   1. Traumatic
   2. Non-traumatic
   3. Not listed, please specify: __________
   4. Prefer not to answer
2. **What types of mobility devices do you use? Check all that apply:**

- Power wheelchair
- Manual wheelchair
- Power assist manual wheelchair (e.g., Triride, Batec, Smart Drive)
- Walker (e.g., rollator)
- Crutches
- Cane
- I don’t use mobility devices
- Not listed, please specify: _______
- Prefer not to answer

1. **Where did you do for acute rehabilitation services (i.e., initial/immediately following your injury)?**

**a)** Name of Hospital/Rehabilitation/Model System: __________

**b)** Prefer not to answer

**All participants:**

1. **How old are you?**
   1. Age (Years): __________
   2. Prefer not to answer
2. **What is your biological sex?**
   1. Male
   2. Female
   3. Intersex
   4. Prefer not to answer
3. **Which gender do you identify with?**
   1. Man
   2. Woman
   3. Transgender
   4. Non-binary
   5. Two-spirit
   6. Not listed, please specify: __________
   7. Prefer not to answer
4. **Do you identify as Indigenous?
   a)** Yes

**b)** No

**c)** Prefer not to answer

1. **Which racial or cultural group(s) best describe(s) you? Select all that apply:**

- Arab
- Black
- East Asian (e.g., Chinese, Japanese, Korean)
- Hispanic (e.g., Latin American)
- South Asian (e.g., East Indian, Pakistani, Sri Lankan)
- Southeast Asian (e.g., Filipino, Vietnamese, Cambodian, Malaysian)
- West Asia (e.g., Iranian, Afghan)
- White
- Not listed, please specify: ________
- I don’t know
- Prefer not to answer

1. **What is your highest level of education? Select all that apply:**

- Below high school
- High school
- Some university/college studies
- University/college degree
- Trades/apprenticeship
- Postgraduate studies (e.g., Master’s., PhD)
- Prefer not to answer

1. **What is your sexual orientation? Select all that apply:**

- Asexual
- Bisexual
- Gay
- Lesbian
- Pansexual
- Queer
- Straight
- Two-spirit
- Unsure/questioning
- Not listed, please specify: _______
- Prefer not to answer

1. **What is your pre-tax household income?**

**a)** <14,999

**b)** 15-29,999

**c)** 30-49,999

**d)** 50-79,999

**e)** 80,000+

**f)** Prefer not to answer

1. **Which country do you reside in?**
   1. Canada
   2. United States
   3. Mexico
   4. Other: _______
   5. Prefer not to answer
