# Supplementary material for: Evaluating the reach, effectiveness, and maintenance of an online spinal cord injury research advocacy course to train research partners
Source: Research Square preprint supplement (doi:10.21203/rs.3.rs-6916049/v1), 2025-07-02
Supplement: Supplementary file 3 [file b56cfa33d9339f9ce5ae65a8.docx]

**Supplementary File 3. Descriptive Statistics (T2 SCI Only, T3 SCI Only and All Participants)**

**Table S3.1 Effectiveness Results – SCI Only Questions**
(n=15 participants)

| **Variables** | **T1:**  **M[IQR]**  **Mean (SD)** | **(Min, Max)** | **T2:**  **M[IQR]**  **Mean (SD)** | **(Min, Max)** |
| --- | --- | --- | --- | --- |
| **Psychological Capability: I know how to…** | | | | |
| **SCI Only**: Engage in meaningful discussions about research during focus groups, interviews, and/or roundtable discussions | 7[1]  6.26 (1.10) | (3,7) | 7[1]  6.60 (0.51) | (6,7) |
| **SCI Only**: Advocate for people with SCI on public forums. | 6[3]  5.20 (1.93) | (1,7) | 7[1]  6.57 (0.64) | (5,7) |
| **Physical Opportunity: My physical environment provides me with the opportunity to…** | | | | |
| **SCI Only:** Engage in meaningful discussions about research during focus groups, interviews, and/or roundtable discussions. | 7[1]  6.07 (1.33) | (3,7) | 7[1]  6.53 (0.64) | (5,7) |
| **SCI Only:** Advocate for people with SCI on public forums. | 6[2]  5.13 (1.81) | (2,7) | 6[1]  6.14 (0.86) | (4,7) |
| **Social Opportunity: My social and/or professional network provides me with the opportunity to…** | | | | |
| **SCI Only:** Engage in meaningful discussions about research during focus groups, interviews, and/or roundtable discussions. | 7[1]  6.20 (1.15) | (3,7) | 6[1]  6.40 (0.63) | (5,7) |
| **SCI Only:** Advocate for people with SCI on public forums. | 6[2]  5.67 (1.29) | (3,7) | 6.5[1]  6.00 (1.57) | (2,7) |
| **Reflective Motivation: I want to…** | | | | |
| **SCI Only:** Engage in meaningful discussions about research during focus groups, interviews, and/or roundtable discussions. | 7[1]  6.20 (1.21) | (4,7) | 7[1]  6.50 (0.71) | (5,7) |
| **SCI Only:** Advocate for people with SCI on public forums. | 6[2]  5.73 (1.62) | (2,7) | 7[1]  6.41 (0.80) | (4,7) |
| **Reflective Motivation: I am confident in my ability to…** | | | | |
| **SCI Only:** Engage in meaningful discussions about research during focus groups, interviews, and/or roundtable discussions. | 7[1]  6.33 (0.90) | (4,7) | 7[0]  6.78 (0.43) | (6,7) |
| **SCI Only:** Advocate for people with SCI on public forums. | 6[2]  5.93 (1.10) | (4,7) | 6[1]  6.29 (0.59) | (5,7) |
| **Reflection Motivation: I see the value in and benefits of...** | | | | |
| **SCI Only:** Engage in meaningful discussions about research during focus groups, interviews, and/or roundtable discussions. | 7[1]  6.33 (1.11) | (3,7) | 7[1]  6.72 (0.46) | (6,7) |
| **SCI Only:** Advocate for people with SCI on public forums. | 7[1]  6.40 (0.74) | (5,7) | 7[0]  6.76 (0.44) | (6,7) |

**Table S3.2 Maintenance Results – All Participants**

*n = 17 participants*

**Primary Effectiveness Measures**

| **Variables** | **Median** | **IQR** | **Min.** | **Max.** |
| --- | --- | --- | --- | --- |
| **Psychological Capability: I know how to…** | | | | |
| **SCI:** Participate on a community advisory board | 6 | 0.25 | 4 | 7 |
| **SCI:** Review grant applications for SCI research | 5 | 3.25 | 2 | 7 |
| **SCI:** Partner with researchers throughout the research process | 6 | 1.25 | 5 | 7 |
| **Researcher:** Meaningfully engage with a consumer advisory board | 5.5 | 1 | 3 | 7 |
| **Researcher:** Review grant applications thatinclude meaningful engagementof people living with SCI | 5 | 2.25 | 2 | 7 |
| **Physical Opportunity: My physical environment provides me with the opportunity to…** | | | | |
| **SCI:** Participate on a community advisory board | 6 | 0.25 | 3 | 7 |
| **SCI:** Review grant applications for SCI research | 6 | 1 | 2 | 7 |
| **SCI:** Partner with researchers throughout the research process | 6 | 0.5 | 5 | 7 |
| **Researcher:** Meaningfully engage with a consumer advisory board | 5 | 2.75 | 2 | 6 |
| **Researcher:** Review grant applications thatinclude meaningful engagementof people living with SCI | 5.5 | 1 | 2 | 6 |
| **Researcher:** Partner with research users in my role | 6 | 2 | 2 | 7 |
| **Social Opportunity: My social and/or professional network provides me with the opportunity to…** | | | | |
| **SCI:** Participate on a community advisory board | 6 | 0.5 | 3 | 7 |
| **SCI:** Review grant applications for SCI research | 6 | 2 | 2 | 7 |
| **SCI:** Partner with researchers throughout the research process | 6 | 1 | 5 | 7 |
| **Researcher:** Meaningfully engage with a consumer advisory board | 5.5 | 1 | 5 | 7 |
| **Researcher:** Review grant applications thatinclude meaningful engagementof people living with SCI | 5.5 | 2.75 | 2 | 7 |
| **Researcher:** Partner with research users in my role | 6 | 1.75 | 3 | 7 |
| **Reflective Motivation: I want to…** | | | | |
| **SCI:** Participate on a community advisory board | 6 | 0.75 | 4 | 7 |
| **SCI:** Review grant applications for SCI research | 5.5 | 1.25 | 2 | 7 |
| **SCI:** Partner with researchers throughout the research process | 6.5 | 2 | 4 | 7 |
| **Researcher:** Meaningfully engage with a consumer advisory board | 6 | 0.75 | 5 | 7 |
| **Researcher:** Review grant applications thatinclude meaningful engagementof people living with SCI | 6 | 2.5 | 1 | 7 |
| **Researcher:** Partner with research users in my role | 6.5 | 1 | 6 | 7 |
| **Reflective Motivation: I am confident in my ability to…** | | | | |
| **SCI:** Participate on a community advisory board | 6 | 0.25 | 4 | 7 |
| **SCI:** Review grant applications for SCI research | 5 | 2 | 2 | 7 |
| **SCI:** Partner with researchers throughout the research process | 6 | 1.25 | 5 | 7 |
| **Researcher:** Meaningfully engage with a consumer advisory board | 6 | 1 | 4 | 7 |
| **Researcher:** Review grant applications thatinclude meaningful engagementof people living with SCI | 4.5 | 3 | 2 | 7 |
| **Researcher:** Partner with research users in my role | 6 | 1.5 | 3 | 7 |
| **Reflective Motivation: I see the value in and benefits of…** | | | | |
| **SCI:** Participate on a community advisory board | 6.5 | 1 | 6 | 7 |
| **SCI:** Review grant applications for SCI research | 6.5 | 1 | 5 | 7 |
| **SCI:** Partner with researchers throughout the research process | 7 | 1 | 5 | 7 |
| **Researcher:** Meaningfully engage with a consumer advisory board | 7 | 0 | 6 | 7 |
| **Researcher:** Review grant applications thatinclude meaningful engagementof people living with SCI | 7 | 1 | 5 | 7 |
| **Researcher:** Partner with research users in my role | 7 | 0.75 | 6 | 7 |

**Secondary Effective Measures**

**Satisfaction and Learning Experiences**

| **Measure** | **Median** | **IQR** | **Min** | **Max** |
| --- | --- | --- | --- | --- |
| Increased my knowledge on SCI | 6 | 1 | 5 | 7 |
| Increased my knowledge on how to be an advocate and/or research partner | 6 | 1 | 5 | 7 |
| Course was relevant to my personal and/or professional development | 7 | 1 | 5 | 7 |
| Course will change my practice | 6 | 1.75 | 4 | 7 |
| Course had already changed my practice | 6 | 1 | 2 | 7 |

**Table S3.2 Maintenance Results – SCI Only**

*n= 12 participants*

| **Variables** | **Median** | **IQR** | **Min.** | **Max.** |
| --- | --- | --- | --- | --- |
| **Psychological Capability: I know how to…** | | | | |
| **SCI Only**: Engage in meaningful discussions about research during focus groups, interviews, and/or roundtable discussions. | 6 | 0.25 | 6 | 7 |
| **SCI Only**: Advocate for people with SCI on public forums. | 6 | 1 | 5 | 7 |
| **Physical Opportunity: My physical environment provides me with the opportunity to…** | | | | |
| **SCI Only:** Engage in meaningful discussions about research during focus groups, interviews, and/or roundtable discussions. | 6 | 0.25 | 4 | 7 |
| **SCI Only:** Advocate for people with SCI on public forums. | 5.5 | 1 | 5 | 7 |
| **Social Opportunity: My social and/or professional network provides me with the opportunity to…** | | | | |
| **SCI Only:** Engage in meaningful   discussions about research during focus   groups, interviews, and/or roundtable   discussions. | 6 | 0 | 4 | 7 |
| **SCI Only:** Advocate for people with SCI   on public forums. | 6 | 2 | 5 | 7 |
| **Reflective Motivation: I want to…** | | | | |
| **SCI Only:** Engage in meaningful   discussions about research during focus   groups, interviews, and/or roundtable   discussions. | 6 | 1.25 | 4 | 7 |
| **SCI Only:** Advocate for people with   SCI on public forums. | 6 | 1.25 | 5 | 7 |
| **Reflective Motivation: I am confident in my ability to…** | | | | |
| **SCI Only:** Engage in meaningful   discussions about research during focus   groups, interviews, and/or roundtable  discussions. | 6 | 0.5 | 4 | 7 |
| **SCI Only:** Advocate for people with   SCI on public forums. | 6 | 1.25 | 5 | 7 |
| **Reflection Motivation: I see the value in and benefits of...** | | | | |
| **SCI Only:** Engage in meaningful   discussions about research during focus   groups, interviews, and/or roundtable  discussions. | 7 | 1 | 4 | 7 |
| **SCI Only:** Advocate for people with   SCI on public forums. | 7 | 1 | 6 | 7 |
